# Supplementary material
Source: publisher figshare collection journal article supplement (https://tandf.figshare.com/ndownloader/files/36379291)
Supplement: Supplementary file 1 [file 36379291]

xread
173 38
Alytes_obstetricans	000000000000011000100001000000011000000000000001010000000?100100100000110100010101101100000001010102000200010000100000101011011100000?01010211000??00200010111101001000010100
Ascaphus_truei	00000000000000000[1 2]000000000000010000000001001?01000011000?10100000000000000000000000100000000000000[0 1]000000010010001100000?1011010000010000?????00??0011001011010100100001?000
Avitabatrachus_uliana	10?1?0??????????132100?010000111?0?????101?0????0?12000?1111????0000?011?11???00?2?0011[3 4]110?0??1?1????0?1?011000??0???????0010????????1[0 1]110000?00??1?21000??0?????????????000
Bombina_variegata	000000000000011000100001000000010000000000000001010000000?100100000000000100010001101111000012010202000100010000[0 1]00000101001100100000200110200?00??01200010011101002000011211
Chelomophrynus_bayi	?0?10010??00011?10200?????????00?1?0000000??00?00?0200010???010100?0?????0??0?010100?1?2?1???0?321????021?011200?01???????1101?1?????????1220???0???0200??0?1200??03???010?01
Cordicephalus_gracilis	1001000?000001001320000010000101?0000010?1000??0??11001?101?????0000??1?100?0?0??2?0???[3 4]1?[0 1]101011102000210011000?00???????01?????100??1?11001???0???1?1???1??100????011001001
Discoglossus_pictus	000000000000011000100000000000011000000010000001010000000?1001000000001101000101011001110100010100010002000100001000001010110111000001010132210022000100010110101001000001000
Eoxenopoides_reuningi	101100011?0110001320?0101000011011?0010101?10??00?110?1?1101????0000??11120??????3?0???310011201110201131?0?10?0?00???????0???????????111100???00???12[0 1]00?1??110????000111000
Gracilibatrachus_avallei	10?10?001?0????01?2?0000?0?0000100?0000001??0??0??0?????10?????????0????001??????200111?1001001?10?000021?0110?01?1???????0??0????00??1??0??????12???2100????200?????00201001
Hadromophryne_natalensis	000000000000001101000000000000011000001000000001010011010?00010?000000110100010012000112100000022001000200001001100000300?1101???100020100??00?012000100010010101102000010000
Hymenochirus_boettgeri	10111110101????01??111???001111011?2120101111?10101201101101000000111?1112131001131212141200120112122113110210001021000210002001?1130011120011202211222100100111111?100000200
Kuruleufenia_xenopoides	?????0???0????????2?0???????0??????????????001??0?01001?11?1011?001011?????????????00?1??1??0??1???2100310????????????????0020111??????0?10000?0???12210?????????????????1???
Llankibatrachus_truebae	1011000110?????01320[0 1]0101010011111??01110110???00?01??1?1121????00?0??11120?0?11?2?0011[3 4]130101011212000310021000110???????00301??100??10[1 2]???????????2???0????110??01011001200
Neusibatrachus_wilferti	10?10000??000??0132?0000?0000001?000?000?0?????00?00??0???10????000???1??10?????01??11140?01001210?00?021?011010??0???????0??0????????1010??2???12???2100?0??100?????00?11000
Oumtkoutia_anae	???1????1???????1???1???????0??????????????0???0??0??010110?021?0?00???????????????0?????1?????1???????????????????????????????????????0?10000??????22110?1??????????????????
Pachycentrata_taqueti	???1?110011?????1??11??????101?????????????1???01?11001011010101001011?????????????20214?3?????1?2??211310???????????????????????????????????????????????????????????????????
Palaeobatrachus_grandipes	1001010100000110132000011000010100?001?0010101?00?010?0?101001000000??1?000?0?0003?0011[3 4]100100121100001200011010101???????0110?0??00??1??0??21??12??12100?1??200??0?000101001
Pelobates_cultripes	00010110010001100100000000010002200000001000000100[0 1]100010?000100000000000101010011000111110012022212100300001100101001200?1101110100010000?????10??00200010002000003010000101
Pipa_carvalhoi	10111010101????013211010100101101011110101111?101002001111011?0011011111121400011210121412010201121221?311011010102100011100300011130111210001102221222000100111011?100010211
Pipa_pipa	10111110[0 1]01????0132110111001011011?1110101111?101001001111011?0011011111112400011210021412010[0 1]011212211311011010102100011100200011130011210001102221222000101111011?100000211
Platyplectrum_ornatum	0000010001000?1101000001000000011000001000000001030000010?0001010000001101000101120002130100000222?0000211002101000000300?110111?10101010132210013000100010011001103?00000???
Pseudhymenochirus_merlini	10111?10001????01??111???001111011?2120101111??01?12001?1101??000001??11121310111312111412001201121221131102100010210002100??????1131?1111000??0221?22210011???1??01100001201
Rhadinosteus_parvus	???1????????????1?2??????????????0????0?????????????????0????????????????????????10?111????????3???????2??0110011????????????1????????01?0??????0???0200?????000????????0????
Rhinophrynus_dorsalis	00110010000001101120000101??0?0001?0000000010000000200010?10010100000000101100000100011201000003210101021101120000111??00?110111?100010100?????00??00200010012000103000010000
Saltenia_ibanezi	10110001000110001320001110000110?1?0011?01?00??00?010?1?1121????0000??11121?0?11?1?0???[0 1]100102011112000310011000110???????0??????100??11[1 2]1?0????0???2??00?1??110?????11111111
Shelania_laurenti	?0110001100?100013200???????0?11?1????11?1?000?0000100101121021???0010?1?2?????????0??1[3 4]?3?????1???????3???21?00???????????????????????0?10000?0????2210?????????????????????
Shelania_pascuali	1[0 1]110001100110001320[0 1]0111010011111?00111011000?00?0100101121????00101?11120?0?1111?0?[1 2]?111[0 1]0?2011112100310011000110???????002010??????11210000?00???22100?1??110??01011001211
Silurana_tropicalis	10111001101????013201011101001131010010101101?101000111011210[0 1]1?0010101112020111121102131000120112121003101200001101000110002010?1000010122010?010002211001111101101000001?10
Singidella_latecostata	10?1?110111????011?111??10?11110?1?0120101111??01?1200101101???????0??11?10?0?01?3?2021410000201?2122113100210001?2???????00?010?1????11???????0201?22?1001?1210?1??100100200
Spea_multiplicata	000001000100011001000000000[0 1]00011000002011000001001[1 2]00010?0001000000001101010100110001111100120[0 2]2202000310001101100000200?110101?100020000??00?10??00200010002001?03000?10211
Thoraciliacus_rostriceps	101100??1000?0?01320000000000001?000011??1?0???00?0??10?0?10????0000??1?100?0????200?11?10010101110200020001120???0???????0??????100??101???????0???1??1??1??110?0???11001001
Vulcanobatrachus_mandelai	10?1?0??1?1????0132??000?0100110?1????1?01?01??00?01?1?111??????00?0??111?1?0?11?2?0???310010???11020?031?01?00??00???????0??0??????????????????????1???0?0??110?????11000001
Xenopus_laevis	111100011001100013201011101001131010010101101?1000001[0 1]111121011?00101[0 1]11120201111[1 2]11011[2 3]1[0 1]11120112121[0 1]0310120010110100011000201011000011122010?021102210101101101101000111200
Xenopus_muelleri	111100011001100013201011101001131010010101101?10000011101121011?001010111202?111111101121311120112121[0 1]03101200101101000110002010?1000011122010?021102211101101101101000000???
Xenopus_romeri	11110001100110001320[0 1]???????0??????????????000?00?0100101121021?001010??????0????2?0011[3 4]?3??01?1???2000310?20?00??????????002010???????0?10000?00??122100????????????????????
Xenopus_wittei	111100011001100013201011101001131010010101101??00001111?1121011?000010111202011111111112101112011212[0 1]003101200101101000110002010?1000010121010?020102211101101101101000000???
Cratopipa_novaolindensis	101100011????????????01???????11?0???1110??????????????????????????01????????????1?0???2?11001011112??0?1?????????????????0??0????????102????0??0??????0??1??110?????11011201
Talisma_pipid	?????????????????????????????????????????????????????????????????????????????????????214??????????????????????????????????002??01??????1?1000110????2220?????????????????????
;


proc /;
comments 0
;
